# Supplementary material for: Colorimetric Detection of Caspase 3 Activity and Reactive Oxygen Derivatives: Potential Early Indicators of Thermal Stress in Corals
Source: Hindawi journal article supplement (doi:10.1155/2016/6825949), 2016-01-01
Supplement: f1 [file 6825949.f1.pdf]

**Colorimetric detection of caspase 3 activity and reactive oxygen derivatives: potential early indicators of thermal stress in corals.**

Mickael Ros<sup>1</sup>, Mathieu Pernice<sup>2</sup>, Sebastien Le Guillou<sup>3</sup>, Martina A. Doblin<sup>2</sup>, Verena Schrameyer<sup>2</sup> and Olivier Laczka<sup>2\*</sup>

<sup>1</sup>Université de Perpignan Via Domitia, 52 avenue Paul Alduy, 66860 Perpignan.

<sup>2</sup>Plant Functional Biology and Climate Change Cluster (C3), University of Technology, Sydney, NSW 2007, Australia.

<sup>3</sup>Université de Brest, 3 Rue des Archives - CS 93837 - 29238 BREST Cedex 3

**Corresponding author:** Dr Olivier Laczka, Plant Functional Biology and Climate Change Cluster (C3), University of Technology Sydney, PO Box 123 Broadway, NSW 2007, Australia.

Email: Olivier.Laczka@uts.edu.au

Phone: +61 2 9514 4159

## Supplementary Information

**Supplementary Table S1:**

Volume of reagents (μL) added into the 96-well plates for the caspase 3 detection assay.

| Components to be added<br>Sample type              | Assay buffer | 200 μM caspase 3 inhibitor | 2 mM caspase 3 substrate | 5 μg/ml commercial caspase 3 | Coral host tissue samples | Total volume |
|----------------------------------------------------|--------------|----------------------------|--------------------------|------------------------------|---------------------------|--------------|
| Blank                                              | 90           | 0                          | 10                       | 0                            | 0                         | 100          |
| Positive control                                   | 85           | 0                          | 10                       | 5                            | 0                         | 100          |
| Negative control for the commercial caspase        | 75           | 10                         | 10                       | 5                            | 0                         | 100          |
| Coral host tissue samples                          | 40           | 0                          | 10                       | 0                            | 50                        | 100          |
| Negative control for the coral host tissue samples | 30           | 10                         | 10                       | 0                            | 50                        | 100          |

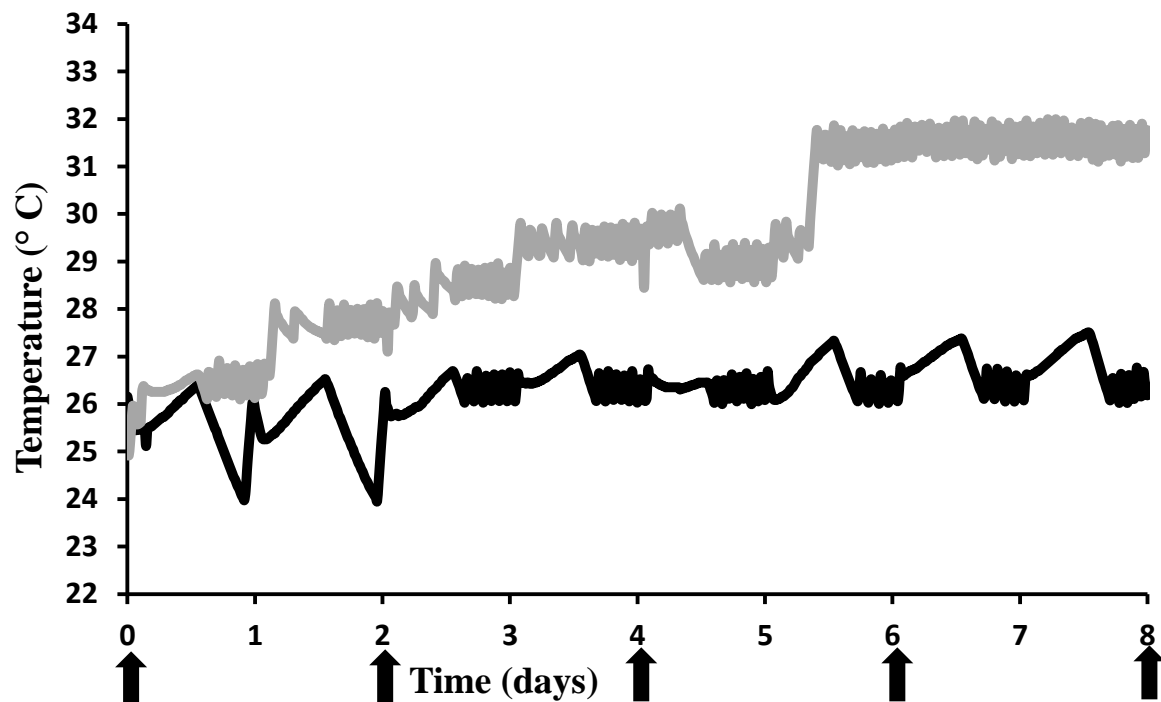

### Supplementary Figure S1:

Temperature in treatments during the experimental period. The control treatment (black line) indicates relatively constant temperature (mean  $26 \pm 0.5$  °C) while the stress treatment shows an average  $0.5^{\circ}\text{C}$  increase every 12 hours until stabilization at  $32^{\circ}\text{C}$  on day 6. Arrows indicate the sampling events.

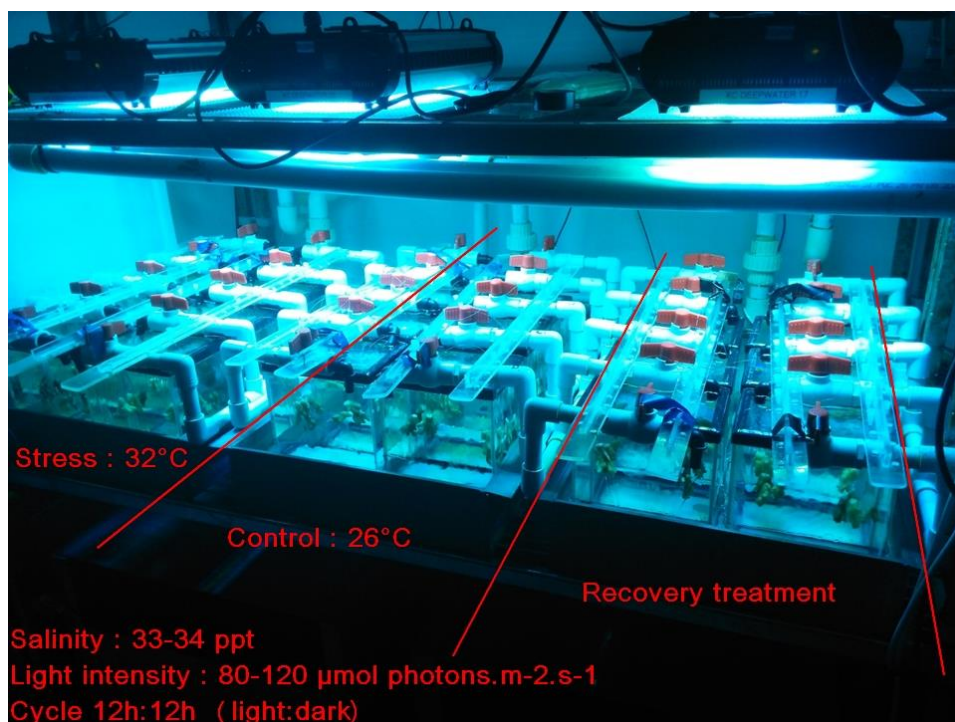

### Supplementary Figure S2:

Configuration of the different incubation tanks.

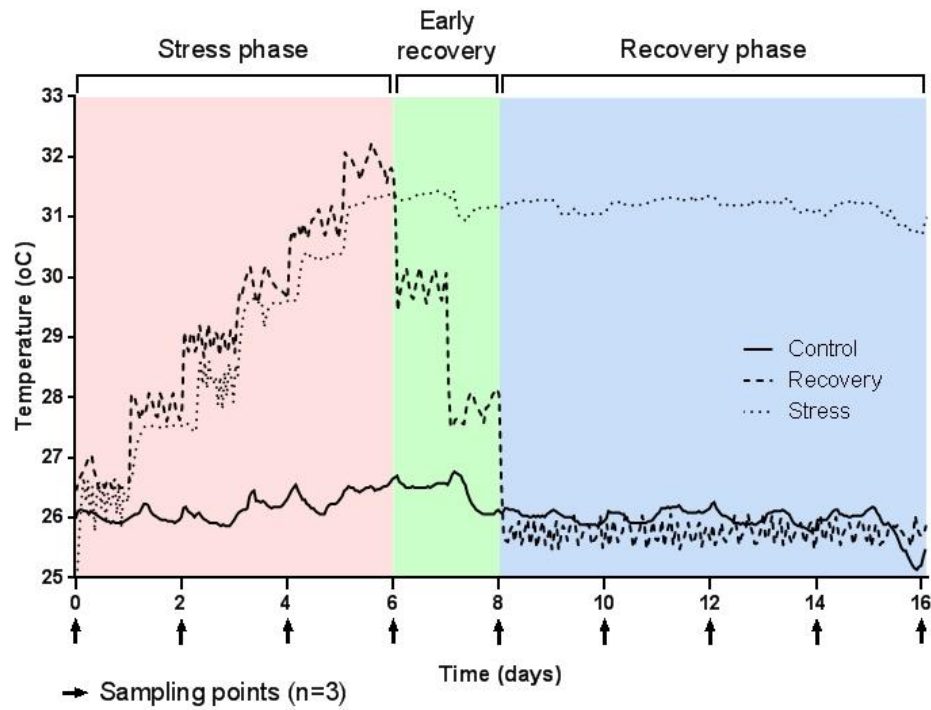

### Supplementary Figure S3:

Temperature in treatments during the thermal-induce stress and recovery experiment.
